# Supplementary material for: Moss kill-dates and modeled summer temperature track episodic snowline lowering and ice-cap expansion in Arctic Canada through the Common Era
Source: Copernicus journal article supplement (doi:10.5194/egusphere-2023-737), 2023-05-02
Supplement: Supplementary file 1 [file egusphere-2023-737-supplement.zip]

Archive with 2 entries (2 files):
- Miller_CommonEra_DateList.xlsx
- Supplemental figures.pdf
