# Supplementary material for: Moss kill-dates and modeled summer temperature track episodic snowline lowering and ice-cap expansion in Arctic Canada through the Common Era
Source: Copernicus journal article supplement (doi:10.5194/egusphere-2023-737), 2023-05-02
Supplement: Supplementary file 1 [file egusphere-2023-737-supplement.zip › Miller_CommonEra_DateList.xlsx]

## Sheet: Sheet1
Field ID	Published	Collection year	Latitude	Longitude	Elev (m asl)	14C Lab ID	14C age	14C ±	Median Calib BP	Calib -	Calib +	Calib CE	Taxon
M81-BM6b	Miller et al., 2012	1981	71.3181	-78.7128	660	GSC-5050	460	25	509.872	-25.8716	21.1284	1440.13	Polytrichum
05SRP-08	Miller et al., 2012	2005	71.4704	-77.5748	826	CURL-9001	1725	15	1621.47	-73.4685	73.5315	328.532	Polytrichum
05SRP-09	Miller et al., 2012	2005	71.4698	-77.5697	824	CURL-8888	1685	15	1576.75	-41.7467	109.253	373.253	Polytrichum
05ORN-01A	Miller et al., 2012	2005	71.5904	-78.2036	802	CURL-8513	1330	15	1254.46	-76.4583	40.5417	695.542	moss
05ORN-03A	Miller et al., 2012	2005	71.5906	-78.2032	803	CURL-8202	1150	15	1045.26	-70.265	128.735	904.735	moss
05SRP-10	Miller et al., 2012	2005	71.4693	-77.5619	823	CURL-8207	1140	15	1026.47	-52.473	146.527	923.527	Polytrichum
05ORN-03B	Miller et al., 2012	2005	71.5906	-78.2032	803	CURL-8891	1140	15	1026.47	-52.473	146.527	923.527	moss
05ORN-03C	Miller et al., 2012	2005	71.5906	-78.2032	803	CURL-8891	1135	15	1021.01	-47.0147	151.985	928.985	moss
05ORN-01B	Miller et al., 2012	2005	71.5904	-78.2036	802	CURL-8607	1110	25	1009.9	-51.901	50.099	940.099	moss
05SRP-11B	Miller et al., 2012	2005	71.4681	-77.5474	824	CURL-8880	1105	15	1006.48	-48.4761	50.5239	943.524	Polytrichum
05ORN-10	Miller et al., 2012	2005	71.5884	-78.1943	825	CURL-7932	940	15	848.465	-55.4647	62.5353	1101.54	moss
05ORN-34	Miller et al., 2012	2005	71.543	-78.0268	894	CURL-8206	930	20	848.134	-60.1336	63.8664	1101.87	moss
05ORN-09	Miller et al., 2012	2005	71.5884	-78.1943	825	CURL-8608	880	25	781.721	-54.7212	119.279	1168.28	moss
05ORN-23	Miller et al., 2012	2005	71.5544	-78.0636	790	CURL-7933	780	15	697.82	-21.8196	25.1804	1252.18	moss
05ORN-38	Miller et al., 2012	2005	71.5429	-78.0248	892	CURL-8515	725	15	669.639	-11.6387	9.36131	1280.36	moss
05TGR-13	Miller et al., 2012	2005	71.3835	-78.7494	708	CURL-8201	690	15	646.377	-74.3768	24.6232	1303.62	Polytrichum
05ORN-13	Miller et al., 2012	2005	71.583	-78.1653	829	CURL-8204	685	15	640.084	-69.0839	29.9161	1309.92	moss
05ORN-39	Miller et al., 2012	2005	71.5417	-78.0066	868	CURL-8609	680	25	626.509	-63.5092	45.4908	1323.49	moss
05ORN-61	Miller et al., 2012	2005	71.5208	-77.9856	799	CURL-9006	660	15	609.287	-46.2866	54.7134	1340.71	Polytrichum
05TGR-27	Miller et al., 2012	2005	71.4052	-78.828	737	CURL-7863	645	20	605.365	-47.3648	54.6352	1344.64	moss
05ORN-62	Miller et al., 2012	2005	71.5268	-77.9949	818	CURL-9007	625	15	604.268	-49.2678	45.7322	1345.73	Polytrichum
05TGR-09	Miller et al., 2012	2005	71.3776	-78.7612	746	CURL-8997	620	15	604.175	-49.1748	44.8252	1345.83	Polytrichum
05SRP-66	Miller et al., 2012	2005	71.4879	-77.5524	774	CURL-8210	615	15	603.78	-49.7796	43.2204	1346.22	moss
05PL-04	Miller et al., 2012	2005	71.6006	-78.4621	767	CURL-8842	615	15	603.78	-49.7796	43.2204	1346.22	Polytrichum
05SRP-61	Miller et al., 2012	2005	71.494	-77.5477	750	CURL-9012	610	15	603.13	-49.1295	41.8705	1346.87	moss
05ORN-44	Miller et al., 2012	2005	71.5389	-77.972	778	CURL-7934	605	15	602.311	-50.3108	41.6892	1347.69	moss
05ORN-20	Miller et al., 2012	2005	71.5614	-78.069	763	CURL-8881	605	15	602.311	-50.3108	41.6892	1347.69	moss
05TGR-01	Miller et al., 2012	2005	71.3182	-78.7051	629	CURL-7928	600	15	601.385	-51.3852	41.6148	1348.61	Salix
05ORN-56B	Miller et al., 2012	2005	71.5151	-77.9663	793	CURL-8894	600	15	601.385	-51.3852	41.6148	1348.61	moss
05SRP-54	Miller et al., 2012	2005	71.5346	-77.3356	880	CURL-8990	595	15	600.336	-52.3362	40.6638	1349.66	moss
05TGR-26	Miller et al., 2012	2005	71.4064	-78.8285	738	CURL-8841	585	20	596.265	-53.2655	44.7345	1353.73	Polytrichum
05SRP-26	Miller et al., 2012	2005	71.5013	-77.4567	833	CURL-8992	575	15	591.748	-49.7484	35.2516	1358.25	moss
05ORN-54	Miller et al., 2012	2005	71.5162	-77.9579	782	CURL-8994	575	15	591.748	-49.7484	35.2516	1358.25	Polytrichum
05SRP-56	Miller et al., 2012	2005	71.5387	-77.3232	885	CURL-8995	565	15	581.29	-44.2896	44.7104	1368.71	moss
05SRP-58	Miller et al., 2012	2005	71.5201	-77.398	863	CURL-8991	560	15	573.82	-41.8202	50.1798	1376.18	moss
05SRP-29	Miller et al., 2012	2005	71.5094	-77.5082	696	CURL-7938	530	20	539.587	-24.5874	81.4126	1410.41	moss
05SRP-52A	Miller et al., 2012	2005	71.5234	-77.3551	874	CURL-7940	480	20	517.29	-15.2904	16.7096	1432.71	Polytrichum
05SRP-24	Miller et al., 2012	2005	71.4997	-77.4493	845	CURL-7936	480	15	516.987	-11.9867	11.0133	1433.01	moss
05SRP-16B	Miller et al., 2012	2005	71.4754	-77.513	797	CURL-8887	465	15	511.874	-10.8737	13.1263	1438.13	Polytrichum
05SRP-27	Miller et al., 2012	2005	71.5066	-77.488	748	CURL-7937	450	15	506.433	-11.4333	12.5667	1443.57	moss
05SRP-47	Miller et al., 2012	2005	71.5187	-77.3977	867	CURL-7939	450	15	506.433	-11.4333	12.5667	1443.57	moss
05SRP-57A	Miller et al., 2012	2005	71.5443	-77.3263	900	CURL-7978	445	20	504.108	-21.1081	19.8919	1445.89	moss
05ORN-17	Miller et al., 2012	2005	71.5661	-78.0919	815	CURL-8205	440	15	502.688	-11.688	13.312	1447.31	Polytrichum
05ORN-57	Miller et al., 2012	2005	71.5178	-77.9708	804	CURL-8989	435	15	500.673	-18.6733	13.3267	1449.33	moss
05PL-02	Miller et al., 2012	2005	71.6006	-78.4621	767	CURL-7931	410	15	485.053	-23.0534	20.9466	1464.95	Polytrichum
05SRP-39	Miller et al., 2012	2005	71.5157	-77.4473	742	CURL-8996	400	15	473.695	-137.695	29.305	1476.31	moss
05TGR-19	Miller et al., 2012	2005	71.4086	-78.7759	663	CURL-7862	355	20	399.667	-81.667	90.333	1550.33	Polytrichum
M09-B113v	Miller et al., 2012	2009	71.067	-74.7094	900.4	CURL-11437	1860	15	1768.67	-48.6747	52.3253	181.325	Polytrichum
M09-B005V	Miller et al., 2012	2009	71.4632	-76.9481	872.5	CURL-11672	1685	20	1581.14	-47.1355	106.864	368.864	Polytrichum
M09-B012V	Miller et al., 2012	2009	71.4518	-76.6041	828.5	CURL-11663	1195	20	1114.76	-50.7599	60.2401	835.24	Polytrichum
M09-B110v	Miller et al., 2012	2009	71.0524	-74.6488	809.5	CURL-11419	1190	20	1111.84	-50.8356	63.1644	838.164	moss
M09-B035V	Miller et al., 2012	2009	71.4694	-77.5594	821.6	CURL-11675	1175	20	1098.84	-97.8379	76.1621	851.162	Polytrichum
M09-B092v	Miller et al., 2012	2009	71.0302	-74.7534	738.9	CURL-11417	1155	20	1059.07	-83.0664	114.934	890.934	moss
M09-B021V	Miller et al., 2012	2009	71.5243	-76.5435	837.4	CURL-11669	1150	20	1047.77	-73.7702	126.23	902.23	moss
M09-B032V	Miller et al., 2012	2009	71.4707	-77.5743	820.6	CURL-11670	1150	20	1047.77	-73.7702	126.23	902.23	Polytrichum
M09-B029V	Miller et al., 2012	2009	71.4716	-77.5809	818.9	CURL-11682	1145	20	1037.96	-64.9624	136.038	912.038	moss
M09-B133v	Miller et al., 2012	2009	71.23	-74.0703	1070.1	CURL-11069	1145	15	1034.38	-59.3753	139.625	915.625	moss
M09-B135v	Miller et al., 2012	2009	71.2297	-74.0696	1069.1	CURL-11070	1140	15	1026.47	-52.473	146.527	923.527	moss
M09-B027V	Miller et al., 2012	2009	71.5588	-75.8242	883.1	CURL-11659	1135	20	1024.02	-64.0182	149.982	925.982	moss
M09-B111v	Miller et al., 2012	2009	71.0457	-74.6663	889.3	CURL-11428	1130	20	1019.47	-58.4725	153.528	930.528	Polytrichum
M09-B129v	Miller et al., 2012	2009	71.0632	-74.7095	912.4	CURL-11433	1125	15	1014.49	-52.4851	47.5149	935.515	Polytrichum
M09-B049V	Miller et al., 2012	2009	71.1096	-75.011	777.3	CURL-11684	1120	20	1013.3	-53.3007	46.6993	936.699	Polytrichum
M09-B047V	Miller et al., 2012	2009	71.0979	-75.4231	857.1	CURL-11654	1110	20	1008.92	-49.9237	48.0763	941.076	moss
M09-B141v	Miller et al., 2012	2009	70.9806	-73.6621	1144.3	CURL-11064	915	15	846.268	-98.2684	59.7316	1103.73	moss
M09-B140v	Miller et al., 2012	2009	70.9807	-73.6621	1143.4	CURL-11060	765	15	687.703	-16.703	34.297	1262.3	moss
M09-B127v	Miller et al., 2012	2009	71.077	-74.678	660.5	CURL-11434	715	15	665.512	-10.512	10.488	1284.49	Sphagnum
M09-B100v	Miller et al., 2012	2009	71.0619	-74.7119	928.3	CURL-11416	690	20	640.437	-71.4374	31.5626	1309.56	moss
M09-B059V	Miller et al., 2012	2009	70.9719	-74.7337	696.1	CURL-11656	685	20	634.922	-66.9217	37.0783	1315.08	Polytrichum
M09-B099v	Miller et al., 2012	2009	71.062	-74.7116	929	CURL-11411	680	20	629.346	-64.3458	41.6542	1320.65	moss
M09-B108v	Miller et al., 2012	2009	71.0402	-74.657	828.5	CURL-11415	665	20	614.706	-52.7063	52.2937	1335.29	Polytrichum
M09-B016V	Miller et al., 2012	2009	71.5155	-76.533	874.4	CURL-11662	665	20	614.706	-52.7063	52.2937	1335.29	moss
M09-B104v	Miller et al., 2012	2009	71.0601	-74.7194	916.5	CURL-11429	655	15	606.188	-44.1884	54.8116	1343.81	Polytrichum
M09-B125v	Miller et al., 2012	2009	71.0746	-74.6758	680.2	CURL-11424	645	20	605.365	-47.3648	54.6352	1344.64	moss
M09-B142v	Miller et al., 2012	2009	70.9073	-73.6187	997.7	CURL-11065	610	15	603.13	-49.1295	41.8705	1346.87	Polytrichum
M09-B227v	Miller et al., 2012	2009	71.7955	-76.6095	1066.2	CURL-11062	565	15	581.29	-44.2896	44.7104	1368.71	Polytrichum
M09-B041V	Miller et al., 2012	2009	71.4526	-77.4772	766	CURL-11657	560	20	576.432	-47.4318	49.5682	1373.57	Polytrichum
M09-B093v	Miller et al., 2012	2009	71.0591	-74.7218	903.5	CURL-11426	550	20	562.627	-35.6266	61.3734	1387.37	moss
M09-B090v	Miller et al., 2012	2009	71.0185	-74.8172	727.1	CURL-11431	460	15	510.084	-11.0839	12.9161	1439.92	Polytrichum
M09-B089v	Miller et al., 2012	2009	71.0173	-74.8122	726.9	CURL-11418	450	20	506.27	-14.2698	17.7302	1443.73	Polytrichum
M09-B120v	Miller et al., 2012	2009	71.0719	-74.6919	778.3	CURL-11423	410	15	485.053	-23.0534	20.9466	1464.95	Sphagnum
M10-B159V	Miller et al., 2012	2010	72.0654	-75.3909	1139.3	CURL-12289	1720	15	1615.31	-68.3087	77.6913	334.691	Andreaea
M10-B130V	Miller et al., 2012	2010	72.5632	-75.9768	633.2	CURL-12313	1715	20	1609.43	-65.4297	84.5703	340.57	Andreaea
M10-B126V	Miller et al., 2012	2010	72.5749	-76.2123	626.2	CURL-12312	1710	20	1604.4	-62.401	87.599	345.599	Polytrichum
M10-B119V	Miller et al., 2012	2010	72.5518	-76.9337	1158.5	CURL-12305	1690	20	1585.77	-50.7664	102.234	364.234	Andreaea
M10-B187V	Miller et al., 2012	2010	73.1961	-81.1925	1030.4	CURL-12311	1685	20	1581.14	-47.1355	106.864	368.864	Polytrichum
M10-B181V	Miller et al., 2012	2010	72.0802	-77.3198	1153	CURL-12285	1680	20	1576.28	-44.2828	111.717	373.717	Polytrichum
M10-B100V	Miller et al., 2012	2010	72.7376	-77.064	1039.8	CURL-12288	1655	15	1539.32	-115.318	143.682	410.682	moss
M10-B034V	Miller et al., 2012	2010	70.9852	-73.1329	1275.1	CURL-12282	1655	20	1539.26	-119.264	145.736	410.736	Polytrichum
M10-B107V	Miller et al., 2012	2010	72.687	-76.7205	681.7	CURL-12284	1150	20	1047.77	-73.7702	126.23	902.23	Polytrichum
M10-B218V	Miller et al., 2012	2010	72.4537	-77.3894	1058.1	CURL-12309	1145	15	1034.38	-59.3753	139.625	915.625	Andreaea
M10-B138V	Miller et al., 2012	2010	72.5485	-75.6755	513	CURL-12286	1140	15	1026.47	-52.473	146.527	923.527	Andreaea
M10-B174V	Miller et al., 2012	2010	72.2444	-78.1457	1051.8	CURL-12310	1050	20	948.342	-25.342	96.658	1001.66	moss
M10-B167V	Miller et al., 2012	2010	72.2562	-77.2983	1144.8	CURL-12290	930	20	848.134	-60.1336	63.8664	1101.87	moss
M10-B193V	Miller et al., 2012	2010	73.2208	-81.9824	813	CURL-12283	755	20	684.86	-17.8598	37.1402	1265.14	moss
M10-B024V	Miller et al., 2012	2010	70.8478	-73.4823	1007.1	CURL-12303	675	15	626.154	-58.1541	42.8459	1323.85	Polytrichum
M10-B210V	Miller et al., 2012	2010	72.2462	-79.1209	840.1	CURL-12299	590	15	599.056	-54.0556	39.9444	1350.94	Polytrichum
M10-B198V	Miller et al., 2012	2010	73.1909	-82.3283	880.5	CURL-12292	510	15	528.641	-13.6412	12.3588	1421.36	Polytrichum
M10-B204V	Miller et al., 2012	2010	72.9683	-82.7973	872	CURL-12287	345	20	392.496	-76.4959	81.5041	1557.5	moss
M10-B032V	Miller et al., 2012	2010	70.9023	-73.2526	1117.9	CURL-12300	310	20	382.573	-77.5729	63.4271	1567.43	moss
M10-B110v		2010	72.7006	-76.8337	960	CURL-23349	1940	15	1863.42	-38.4234	60.5766	86.5766	Polytrichum
M10-B216v		2010	72.2921	-78.567	941.7	CURL-23351	1855	15	1763.1	-47.1012	57.8988	186.899	Andreaea
M10-B155v		2010	72.1022	-74.9895	839.8	CURL-23326	1810	15	1698.63	-65.6295	39.3705	251.371	Polytrichum
M10-B151v		2010	72.2786	-75.3231	854.5	CURL-23329	1740	15	1638.68	-66.678	62.322	311.322	Polytrichum
M10-B078v		2010	71.4719	-75.2508	882.4	CURL-23324	1730	15	1627.56	-79.564	69.436	322.436	Polytrichum
M10-B123v		2010	72.5484	-76.6394	1155.6	CURL-23342	1710	15	1603.39	-58.3856	87.6144	346.614	Andreaea
M10-B111v		2010	72.6103	-77.1909	918.4	CURL-23341	1240	15	1180.28	-105.284	83.7157	769.716	moss
M10-B102v		2010	72.72	-76.908	922	CURL-23352	1150	15	1045.26	-70.265	128.735	904.735	moss
M10-B141v		2010	72.5127	-75.8813	832.9	CURL-23340	1145	20	1037.96	-64.9624	136.038	912.038	Polytrichum
M10-B202v		2010	73.0066	-82.2904	874.4	CURL-23325	1130	15	1017.24	-44.2356	47.7644	932.764	Polytrichum
M10-B179v		2010	71.7598	-77.1614	968.2	CURL-23330	950	15	848.734	-54.7343	67.2657	1101.27	Polytrichum
M10-B182v		2010	73.1424	-80.8228	740.3	CURL-23343	710	15	663.002	-10.0017	11.9983	1287	Andreaea
M10-B082v		2010	71.6575	-75.9652	965	CURL-23327	680	15	633.194	-64.1944	35.8056	1316.81	moss
M10-B050v		2010	72.0001	-76.2651	945.1	CURL-23334	640	15	603.505	-44.5045	49.4955	1346.5	Polytrichum
M10-B153v		2010	72.1684	-75.295	895.8	CURL-23360	410	15	485.053	-23.0534	20.9466	1464.95	Polytrichum
18ORN-027V		2018	71.546	-78.0356	854	CURL-24490	1755	20	1648.11	-60.1087	60.8913	301.891	Polytrichum
18ORN-026V		2018	71.5474	-78.0417	838	CURL-24923	1695	15	1587.12	-49.1186	100.881	362.881	Polytrichum
18ORN-048V		2018	71.5548	-78.061	772	CURL-24492	1640	20	1504.68	-89.6764	63.3236	445.324	Polytrichum
18ORN-025V		2018	71.549	-78.047	817	CURL-24498	1160	20	1070.88	-93.8773	104.123	879.123	Polytrichum
18ORN-034V		2018	71.5469	-78.0019	820	CURL-24927	1145	15	1034.38	-59.3753	139.625	915.625	Polytrichum
18ORN-001V		2018	71.5815	-78.1602	823	CURL-24465	1130	20	1019.47	-58.4725	153.528	930.528	Polytrichum
18ORN-043V		2018	71.5371	-77.9553	753	CURL-24484	1125	25	1018.75	-60.7544	154.246	931.246	Polytrichum
18ORN-028V		2018	71.5457	-78.0296	871	CURL-24913	1125	15	1014.49	-52.4851	47.5149	935.515	Polytrichum
18ORN-050V		2018	71.5581	-78.0644	760	CURL-24503	1105	25	1007.4	-50.4008	52.5992	942.599	Polytrichum
18ORN-024V		2018	71.5502	-78.0494	808	CURL-24469	1095	25	1001.93	-64.9268	56.0732	948.073	Polytrichum
18ORN-029V		2018	71.5448	-78.0234	877	CURL-24500	1080	20	988.973	-58.9731	66.0269	961.027	Polytrichum
18ORN-041V		2018	71.5372	-77.9399	738	CURL-24502	995	20	893.29	-93.2903	61.7097	1056.71	Polytrichum
18ORN-031V		2018	71.5458	-78.0148	866	CURL-24499	960	20	852.807	-58.8074	68.1926	1097.19	Polytrichum
18ORN-035V		2018	71.5472	-77.9988	804	CURL-24480	930	20	848.134	-60.1336	63.8664	1101.87	Polytrichum
18ORN-032V		2018	71.5473	-78.0103	848	CURL-24908	750	15	678.653	-11.6534	37.3466	1271.35	Polytrichum
18ORN-007V		2018	71.5872	-78.1319	789	CURL-24463	710	20	658.834	-84.8341	18.1659	1291.17	moss
18ORN-006V		2018	71.5813	-78.1489	806	CURL-24467	690	20	640.437	-71.4374	31.5626	1309.56	moss
18ORN-005V		2018	71.5809	-78.1549	816	CURL-24488	675	20	623.957	-60.9565	46.0435	1326.04	Polytrichum
18ORN-058V		2018	71.5614	-78.0911	784	CURL-24496	645	20	605.365	-47.3648	54.6352	1344.64	Polytrichum
18ORN-021V		2018	71.5648	-78.0905	797	CURL-24495	620	20	603.451	-49.4509	46.5491	1346.55	Polytrichum
18ORN-039V		2018	71.5408	-77.9347	719	CURL-24483	605	20	601.734	-51.7338	44.2662	1348.27	Sphagnum
18ORN-002V		2018	71.5809	-78.1591	822	CURL-24487	595	20	599.599	-53.5989	44.4011	1350.4	Polytrichum
18ORN-056V		2018	71.56	-78.0406	734	CURL-24481	590	20	598.123	-54.1226	44.8774	1351.88	Polytrichum
18ORN-033V		2018	71.5477	-78.0063	833	CURL-24468	585	20	596.265	-53.2655	44.7345	1353.73	Polytrichum
18ORN-013V		2018	71.5869	-78.0751	774	CURL-24471	495	20	522.784	-14.7839	17.2161	1427.22	Polytrichum
18ORN-044V		2018	71.5388	-77.9668	749	CURL-24485	475	20	515.544	-16.5437	14.4563	1434.46	moss
18ORN-046V		2018	71.5523	-78.0542	788	CURL-24466	470	20	513.796	-15.7963	14.2037	1436.2	Polytrichum
18ORN-036V		2018	71.5427	-77.9605	739	CURL-24491	390	20	446.803	-116.803	55.1971	1503.2	Polytrichum
18ORN-057V		2018	71.5632	-78.0793	766	CURL-24501	385	20	438.469	-109.469	62.5314	1511.53	moss
18ORN-053V		2018	71.559	-78.0519	749	CURL-24470	380	20	430.385	-101.385	67.6147	1519.61	Polytrichum
18ORN-010V		2018	71.5901	-78.0922	762	CURL-24474	380	20	430.385	-101.385	67.6147	1519.61	Polytrichum
18ORN-008V		2018	71.5895	-78.104	763	CURL-24473	360	20	404.303	-85.3034	86.6966	1545.7	Polytrichum
18ORN-020V		2018	71.5651	-78.0871	793	CURL-24464	340	20	389.861	-74.8611	81.1389	1560.14	Polytrichum
M19-B044		2019	71.4709	-77.5707	847	CURL-26381	1735	20	1630.81	-82.807	70.193	319.193	Polytrichum
M19-B007		2019	71.5242	-77.3558	908	CURL-26242	1695	20	1590.32	-54.3167	98.6833	359.683	Polytrichum
M19-B043		2019	71.4715	-77.5745	843	CURL-26384	1690	20	1585.77	-50.7664	102.234	364.234	Polytrichum
M19-B041		2019	71.4483	-77.4715	812	CURL-26379	1195	20	1114.76	-50.7599	60.2401	835.24	Polytrichum
M19-B003		2019	71.5508	-77.326	905	CURL-26377	1180	20	1104.38	-97.3827	70.6173	845.617	Polytrichaceae
M19-B006		2019	71.5182	-77.3719	900	CURL-26236	1155	20	1059.07	-83.0664	114.934	890.934	Polytrichum
M19-B042		2019	71.4526	-77.4821	840	CURL-26387	1155	20	1059.07	-83.0664	114.934	890.934	Polytrichaceae
M19-B045		2019	71.4707	-77.5683	848	CURL-26383	1150	15	1045.26	-70.265	128.735	904.735	Polytrichum
M19-B011		2019	71.4751	-77.5186	851	CURL-26252	1120	20	1013.3	-53.3007	46.6993	936.699	Polytrichum
M19-B038		2019	71.5321	-77.3417	847	CURL-26262	1095	20	1001.93	-45.9339	55.0661	948.066	Polytrichum
M19-B002		2019	71.5449	-77.3231	905	CURL-26378	825	20	717.74	-34.7399	53.2601	1232.26	Andreaea
M19-B009		2019	71.4778	-77.5141	843	NSRL-39448	810	15	707.611	-22.6108	21.3892	1242.39	Andreaea
M19-B026		2019	72.4024	-77.4594	964.8	CURL-26258	800	20	705.231	-24.231	23.769	1244.77	Polytrichum
M19-B047		2019	71.4868	-77.5472	769	CURL-26388	790	20	702.342	-24.3424	24.6576	1247.66	Polytrichum
M19-B022		2019	72.4019	-77.4574	962.6	CURL-26230	775	20	696.519	-22.5188	27.4812	1253.48	Polytrichum
M19-B030		2019	71.5131	-77.4239	799	CURL-26239	720	20	665.426	-13.4264	16.5736	1284.57	Polytrichum
M19-B012		2019	71.5009	-77.4475	853	CURL-26246	670	15	619.508	-54.5082	48.4918	1330.49	Polytrichum
M19-B015		2019	71.5099	-77.4942	743	CURL-26380	655	20	608.513	-48.5127	55.4873	1341.49	Polytrichum
M19-B020		2019	72.4013	-77.4569	954.5	CURL-26238	630	20	603.944	-48.9445	49.0555	1346.06	Polytrichum
M19-B036		2019	71.5182	-77.3946	847	CURL-26260	615	20	603.048	-50.0478	44.9522	1346.95	Polytrichum
M19-B040		2019	71.449	-77.4745	809	CURL-26382	585	15	597.361	-53.3614	32.6386	1352.64	Polytrichum
M19-B004		2019	71.5401	-77.3204	901	CURL-26248	575	20	590.887	-57.8868	41.1132	1359.11	Andreaea
M19-B001		2019	71.545	-77.323	786.3	CURL-26228	565	20	582.242	-52.2418	44.7582	1367.76	Andreaea
M19-B008		2019	71.5244	-77.3591	908	CURL-26376	560	20	576.432	-47.4318	49.5682	1373.57	Andreaea
M19-B048		2019	71.489	-77.5419	779	CURL-26386	550	20	562.627	-35.6266	61.3734	1387.37	Polytrichum
M19-B046		2019	71.4696	-77.5516	772	CURL-26385	520	20	533.407	-19.4069	14.5931	1416.59	Polytrichum
M19-B010		2019	71.4778	-77.5145	843	CURL-26256	510	20	528.833	-16.833	15.167	1421.17	Polytrichaceae
M19-B039		2019	71.4861	-77.5493	815	CURL-26261	510	20	528.833	-16.833	15.167	1421.17	Polytrichum
M19-B013		2019	71.5015	-77.4495	857	CURL-26229	505	20	526.755	-15.7547	16.2453	1423.25	Polytrichum
M19-B031		2019	71.5131	-77.424	799	CURL-26253	475	15	515.317	-11.3173	11.6827	1434.68	Andreaea
M19-B033		2019	71.5208	-77.3947	853	CURL-26254	460	20	510.19	-14.1897	14.8103	1439.81	Polytrichum
M19-B035		2019	71.525	-77.4019	832	CURL-26267	455	20	508.282	-14.2823	15.7177	1441.72	Polytrichum
M19-B024		2019	72.4021	-77.4588	965.4	CURL-26241	450	20	506.27	-14.2698	17.7302	1443.73	Polytrichum
M19-B018		2019	72.4027	-77.4577	934.9	CURL-26266	445	15	504.585	-11.5847	11.4153	1445.42	Polytrichum
M19-B034		2019	71.5225	-77.3974	842	CURL-26255	430	20	495.953	-21.9525	19.0475	1454.05	Polytrichum
M19-B028		2019	71.5139	-77.44	778	NSRL-39449	400	15	473.695	-137.695	29.305	1476.31	Andreaea
M19-B014		2019	71.5098	-77.4941	743	CURL-26233	405	20	470.465	-136.465	36.5354	1479.54	Polytrichum
M19-B027		2019	71.5142	-77.4426	778	CURL-26232	365	20	409.698	-89.6982	82.3018	1540.3	Andreaea
M19-B029		2019	71.5137	-77.433	780	NSRL-39450	265	15	311.142	-154.142	109.858	1638.86	Andreaea
